# Supplementary material
Source: publisher figshare collection journal article supplement (https://rs.figshare.com/ndownloader/files/17842787)
Supplement: Supplementary file 1 [file 17842787]

10	0.1	0.99	1	-1	0.03	0.04	0.4	0.6	5	1	13.939	0.00209
10	0.4	0.99	1	-1	0.03	0.04	0.4	0.8	5	1	19.48	0.00306
10	0.3	0.99	1	-1	0.03	0.04	0.4	0.9	5	1	14.741	0.00046
10	0.01	0.99	1	-1	0.03	0.04	0.4	0.9	5	1	9.5832	0
10	0.01	0.99	1	-1	0.03	0.04	0.4	0.8	5	1	10.239	0
10	0.4	0.99	1	-1	0.03	0.04	0.4	0.9	5	1	17.996	0.00146
10	0.6	0.99	1	-1	0.03	0.04	0.4	0.8	5	1	34.193	0.01131
10	0.2	0.99	1	-1	0.03	0.04	0.4	0.8	5	1	13.367	0.00043
10	0.6	0.99	1	-1	0.03	0.04	0.4	0.7	5	1	36.916	0.01614
10	0.3	0.99	1	-1	0.03	0.04	0.4	0.3	5	1	27.055	0.03484
10	0.4	0.99	1	-1	0.03	0.04	0.4	0.7	5	1	21.45	0.00581
10	0.4	0.99	1	-1	0.03	0.04	0.4	0	5	1	41.969	0.1016
10	0.2	0.99	1	-1	0.03	0.04	0.4	0.7	5	1	14.649	0.00163
10	0.3	0.99	1	-1	0.03	0.04	0.4	0.7	5	1	17.441	0.00348
10	0.1	0.99	1	-1	0.03	0.04	0.4	0.7	5	1	12.605	0.00073
10	0.1	0.99	1	-1	0.03	0.04	0.4	0.1	5	1	25.522	0.05664
10	0.2	0.99	1	-1	0.03	0.04	0.4	0.1	5	1	28.796	0.06521
10	0.1	0.99	1	-1	0.03	0.04	0.4	0.5	5	1	15.455	0.00469
10	0.2	0.99	1	-1	0.03	0.04	0.4	0.9	5	1	12.497	0.00012
10	0.01	0.99	1	-1	0.03	0.04	0.4	0.7	5	1	11.153	3e-05
10	0.5	0.99	1	-1	0.03	0.04	0.4	0.2	5	1	42.336	0.06573
10	0.4	0.99	1	-1	0.03	0.04	0.4	0.6	5	1	23.737	0.0109
10	0.1	0.99	1	-1	0.03	0.04	0.4	0.8	5	1	11.479	0.00019
10	0.1	0.99	1	-1	0.03	0.04	0.4	0.9	5	1	10.717	4e-05
10	0.5	0.99	1	-1	0.03	0.04	0.4	0.9	5	1	23.232	0.00295
10	0.4	0.99	1	-1	0.03	0.04	0.4	0.1	5	1	38.936	0.07969
10	0.3	0.99	1	-1	0.03	0.04	0.4	0.8	5	1	15.947	0.00145
10	0.01	0.99	1	-1	0.03	0.04	0.4	0.6	5	1	12.121	0.00037
10	0.5	0.99	1	-1	0.03	0.04	0.4	0.8	5	1	25.136	0.00571
10	0.2	0.99	1	-1	0.03	0.04	0.4	0.6	5	1	16.217	0.00387
10	0.1	0.99	1	-1	0.03	0.04	0.4	0.4	5	1	17.417	0.01075
10	0.01	0.99	1	-1	0.03	0.04	0.4	0.1	5	1	23.095	0.04375
10	0.2	0.99	1	-1	0.03	0.04	0.4	0.5	5	1	17.908	0.00884
10	0.1	0.99	1	-1	0.03	0.04	0.4	0.3	5	1	19.964	0.02045
10	0.6	0.99	1	-1	0.03	0.04	0.4	0.9	5	1	31.239	0.00644
10	0.5	0.99	1	-1	0.03	0.04	0.4	0.7	5	1	27.281	0.01013
10	0.2	0.99	1	-1	0.03	0.04	0.4	0.4	5	1	20.245	0.0161
10	0.5	0.99	1	-1	0.03	0.04	0.4	0.6	5	1	29.965	0.01619
10	0.3	0.99	1	-1	0.03	0.04	0.4	0.6	5	1	19.142	0.00645
10	0.1	0.99	1	-1	0.03	0.04	0.4	0	5	1	28.724	0.08426
10	0.3	0.99	1	-1	0.03	0.04	0.4	0.4	5	1	23.95	0.02172
10	0.01	0.99	1	-1	0.03	0.04	0.4	0.5	5	1	13.589	0.00171
10	0.5	0.99	1	-1	0.03	0.04	0.4	0.4	5	1	36.31	0.03649
10	0.01	0.99	1	-1	0.03	0.04	0.4	0.2	5	1	20.083	0.02392
10	0.3	0.99	1	-1	0.03	0.04	0.4	0.5	5	1	21.544	0.01225
10	0.2	0.99	1	-1	0.03	0.04	0.4	0.2	5	1	25.716	0.04382
10	0.2	0.99	1	-1	0.03	0.04	0.4	0.3	5	1	22.918	0.02768
10	0.1	0.99	1	-1	0.03	0.04	0.4	0.2	5	1	22.513	0.03572
10	0.6	0.99	1	-1	0.03	0.04	0.4	0.6	5	1	39.669	0.02349
10	0.01	0.99	1	-1	0.03	0.04	0.4	0.4	5	1	15.295	0.00447
10	0.7	0.99	1	-1	0.03	0.04	0.4	0.3	5	1	68.587	0.06295
10	0.01	0.99	1	-1	0.03	0.04	0.4	0.3	5	1	17.474	0.01123
10	0.5	0.99	1	-1	0.03	0.04	0.4	0.5	5	1	33.074	0.02598
10	0.4	0.99	1	-1	0.03	0.04	0.4	0.2	5	1	35.676	0.05996
10	0.6	0.99	1	-1	0.03	0.04	0.4	0.5	5	1	43.04	0.0326
10	0.5	0.99	1	-1	0.03	0.04	0.4	0.3	5	1	39.227	0.04916
10	0.8	0.99	1	-1	0.03	0.04	0.4	0.8	5	1	84.578	0.03332
10	0.01	0.99	1	-1	0.03	0.04	0.4	0	5	1	26.006	0.07031
10	0.4	0.99	1	-1	0.03	0.04	0.4	0.5	5	1	26.084	0.0181
10	0.3	0.99	1	-1	0.03	0.04	0.4	0.2	5	1	29.789	0.05274
10	0.7	0.99	1	-1	0.03	0.04	0.4	0.9	5	1	46.911	0.01364
10	0.2	0.99	1	-1	0.03	0.04	0.4	0	5	1	32.06	0.09251
10	0.3	0.99	1	-1	0.03	0.04	0.4	0.1	5	1	33.134	0.07429
10	0.4	0.99	1	-1	0.03	0.04	0.4	0.4	5	1	28.981	0.02826
50	0.01	0.99	1	-1	0.03	0.04	0.4	0.9	5	1	51.588	0
10	0.4	0.99	1	-1	0.03	0.04	0.4	0.3	5	1	31.915	0.0416
10	0.6	0.99	1	-1	0.03	0.04	0.4	0.3	5	1	50.341	0.05602
10	0.7	0.99	1	-1	0.03	0.04	0.4	0.7	5	1	53.722	0.02593
10	0.5	0.99	1	-1	0.03	0.04	0.4	0	5	1	50.074	0.1056
10	0.7	0.99	1	-1	0.03	0.04	0.4	0.6	5	1	57.316	0.03295
10	0.3	0.99	1	-1	0.03	0.04	0.4	0	5	1	36.386	0.0967
10	0.7	0.99	1	-1	0.03	0.04	0.4	0.4	5	1	65.189	0.05366
10	0.6	0.99	1	-1	0.03	0.04	0.4	0.4	5	1	46.976	0.04463
10	0.6	0.99	1	-1	0.03	0.04	0.4	0	5	1	62.369	0.10884
10	0.7	0.99	1	-1	0.03	0.04	0.4	0.5	5	1	61.227	0.04279
10	0.7	0.99	1	-1	0.03	0.04	0.4	0.8	5	1	49.954	0.01949
10	0.5	0.99	1	-1	0.03	0.04	0.4	0.1	5	1	46.606	0.08252
50	0.3	0.99	1	-1	0.03	0.04	0.4	0.9	5	1	76.623	0
50	0.2	0.99	1	-1	0.03	0.04	0.4	0.7	5	1	74.423	0
10	0.7	0.99	1	-1	0.03	0.04	0.4	0.1	5	1	77.275	0.09485
50	0.01	0.99	1	-1	0.03	0.04	0.4	0.6	5	1	62.106	0
50	0.2	0.99	1	-1	0.03	0.04	0.4	0.5	5	1	87.321	0
10	0.6	0.99	1	-1	0.03	0.04	0.4	0.2	5	1	54.287	0.07208
10	0.7	0.99	1	-1	0.03	0.04	0.4	0	5	1	81.165	0.10823
10	0.8	0.99	1	-1	0.03	0.04	0.4	0.9	5	1	80.236	0.02668
10	0.6	0.99	1	-1	0.03	0.04	0.4	0.1	5	1	57.749	0.08874
10	0.9	0.99	1	-1	0.03	0.04	0.4	0.5	5	1	201.36	0.07016
10	0.8	0.99	1	-1	0.03	0.04	0.4	0.7	5	1	88.534	0.0395
10	0.9	0.99	1	-1	0.03	0.04	0.4	0.2	5	1	217.9	0.08647
50	0.1	0.99	1	-1	0.03	0.04	0.4	0.3	5	1	93.955	0
50	0.01	0.99	1	-1	0.03	0.04	0.4	0.8	5	1	54.931	0
10	0.7	0.99	1	-1	0.03	0.04	0.4	0.2	5	1	73.157	0.07817
10	0.8	0.99	1	-1	0.03	0.04	0.4	0.6	5	1	92.649	0.0474
50	0.2	0.99	1	-1	0.03	0.04	0.4	0.8	5	1	70.056	0
50	0.1	0.99	1	-1	0.03	0.04	0.4	0.9	5	1	57.17	0
10	0.9	0.99	1	-1	0.03	0.04	0.4	0.1	5	1	221.42	0.09137
50	0.01	0.99	1	-1	0.03	0.04	0.4	0.7	5	1	58.431	0
50	0.2	0.99	1	-1	0.03	0.04	0.4	0.9	5	1	65.956	0
10	0.8	0.99	1	-1	0.03	0.04	0.4	0.5	5	1	96.587	0.05422
50	0.1	0.99	1	-1	0.03	0.04	0.4	0.6	5	1	69.988	0
50	0.1	0.99	1	-1	0.03	0.04	0.4	0.2	5	1	110.93	0.00014
10	0.8	0.99	1	-1	0.03	0.04	0.4	0.4	5	1	101.79	0.06475
50	0.4	0.99	1	-1	0.03	0.04	0.4	0.8	5	1	98.348	0
50	0.2	0.99	1	-1	0.03	0.04	0.4	0.4	5	1	96.01	0
10	0.8	0.99	1	-1	0.03	0.04	0.4	0.3	5	1	106.12	0.07457
10	0.8	0.99	1	-1	0.03	0.04	0.4	0.1	5	1	114.66	0.09617
10	0.8	0.99	1	-1	0.03	0.04	0.4	0	5	1	119.02	0.10781
50	0.1	0.99	1	-1	0.03	0.04	0.4	0.8	5	1	60.93	0
10	0.8	0.99	1	-1	0.03	0.04	0.4	0.2	5	1	110.88	0.08446
50	0.1	0.99	1	-1	0.03	0.04	0.4	0.7	5	1	65.271	0
50	0.01	0.99	1	-1	0.03	0.04	0.4	0.5	5	1	68.284	0
50	0.01	0.99	1	-1	0.03	0.04	0.4	0.4	5	1	75.419	0
50	0.1	0.99	1	-1	0.03	0.04	0.4	0.5	5	1	75.162	0
50	0.3	0.99	1	-1	0.03	0.04	0.4	0.8	5	1	81.458	0
50	0.3	0.99	1	-1	0.03	0.04	0.4	0.6	5	1	93.662	0
50	0.01	0.99	1	-1	0.03	0.04	0.4	0.2	5	1	98.529	1e-05
50	0.4	0.99	1	-1	0.03	0.04	0.4	0.9	5	1	92.6	0
50	0.01	0.99	1	-1	0.03	0.04	0.4	0.3	5	1	84.505	0
50	0.2	0.99	1	-1	0.03	0.04	0.4	0.6	5	1	80.068	0
50	0.5	0.99	1	-1	0.03	0.04	0.4	0.9	5	1	114.91	0
50	0.4	0.99	1	-1	0.03	0.04	0.4	0.7	5	1	104.55	0
50	0.3	0.99	1	-1	0.03	0.04	0.4	0.7	5	1	86.931	0
50	0.1	0.99	1	-1	0.03	0.04	0.4	0.4	5	1	84.296	0
10	0.9	0.99	1	-1	0.03	0.04	0.4	0.9	5	1	185.42	0.04947
10	0.9	0.99	1	-1	0.03	0.04	0.4	0.8	5	1	190.61	0.05399
10	0.9	0.99	1	-1	0.03	0.04	0.4	0.4	5	1	209.02	0.07531
10	0.9	0.99	1	-1	0.03	0.04	0.4	0	5	1	226.83	0.09991
50	0.4	0.99	1	-1	0.03	0.04	0.4	0.4	5	1	134.36	2e-05
10	0.9	0.99	1	-1	0.03	0.04	0.4	0.3	5	1	213.17	0.08101
50	0.4	0.99	1	-1	0.03	0.04	0.4	0.6	5	1	113.15	0
10	0.9	0.99	1	-1	0.03	0.04	0.4	0.7	5	1	194	0.06031
50	0.2	0.99	1	-1	0.03	0.04	0.4	0.3	5	1	109.91	2e-05
10	0.9	0.99	1	-1	0.03	0.04	0.4	0.6	5	1	197.81	0.06585
50	0.3	0.99	1	-1	0.03	0.04	0.4	0.5	5	1	101.83	0
50	0.4	0.99	1	-1	0.03	0.04	0.4	0.5	5	1	122.51	0
50	0.4	0.99	1	-1	0.03	0.04	0.4	0.3	5	1	153.28	0.0004
50	0.5	0.99	1	-1	0.03	0.04	0.4	0.6	5	1	139.63	0
50	0.3	0.99	1	-1	0.03	0.04	0.4	0.4	5	1	112.49	1e-05
50	0.5	0.99	1	-1	0.03	0.04	0.4	0.7	5	1	130.42	0
50	0.5	0.99	1	-1	0.03	0.04	0.4	0.8	5	1	121.71	0
50	0.3	0.99	1	-1	0.03	0.04	0.4	0.3	5	1	127.09	0.00012
50	0.1	0.99	1	-1	0.03	0.04	0.4	0	5	1	199.86	0.01405
50	0.2	0.99	1	-1	0.03	0.04	0.4	0.2	5	1	128.44	0.00042
50	0.1	0.99	1	-1	0.03	0.04	0.4	0.1	5	1	139.72	0.00178
50	0.6	0.99	1	-1	0.03	0.04	0.4	0.9	5	1	152.26	0
50	0.5	0.99	1	-1	0.03	0.04	0.4	0.5	5	1	151.82	3e-05
50	0.01	0.99	1	-1	0.03	0.04	0.4	0.1	5	1	121.26	0.00028
50	0.2	0.99	1	-1	0.03	0.04	0.4	0.1	5	1	161.66	0.00345
50	0.6	0.99	1	-1	0.03	0.04	0.4	0.8	5	1	162.08	0
50	0.5	0.99	1	-1	0.03	0.04	0.4	0.4	5	1	168.27	0.00017
50	0.3	0.99	1	-1	0.03	0.04	0.4	0.2	5	1	151.07	0.00094
50	0.4	0.99	1	-1	0.03	0.04	0.4	0.2	5	1	181.74	0.00178
50	0.6	0.99	1	-1	0.03	0.04	0.4	0.7	5	1	172.48	0
50	0.6	0.99	1	-1	0.03	0.04	0.4	0.6	5	1	185.74	0
50	0.6	0.99	1	-1	0.03	0.04	0.4	0.5	5	1	200.65	0.0001
50	0.7	0.99	1	-1	0.03	0.04	0.4	0.9	5	1	220.42	0
50	0.5	0.99	1	-1	0.03	0.04	0.4	0.3	5	1	191.69	0.00066
50	0.7	0.99	1	-1	0.03	0.04	0.4	0.8	5	1	233.08	0
10	0.99	0.99	1	-1	0.03	0.04	0.4	0.8	5	1	1222.9	0.08126
10	0.99	0.99	1	-1	0.03	0.04	0.4	0.5	5	1	1237.3	0.08126
50	0.6	0.99	1	-1	0.03	0.04	0.4	0.4	5	1	222.61	0.00043
50	0.4	0.99	1	-1	0.03	0.04	0.4	0.1	5	1	234.93	0.00854
50	0.3	0.99	1	-1	0.03	0.04	0.4	0.1	5	1	192.37	0.0061
10	0.99	0.99	1	-1	0.03	0.04	0.4	0.9	5	1	1227.6	0.08287
10	0.99	0.99	1	-1	0.03	0.04	0.4	0	5	1	1229.2	0.08254
50	0.5	0.99	1	-1	0.03	0.04	0.4	0.2	5	1	231.58	0.00321
50	0.7	0.99	1	-1	0.03	0.04	0.4	0.7	5	1	249.46	5e-05
50	0.7	0.99	1	-1	0.03	0.04	0.4	0.6	5	1	265.68	0.0001
50	0.01	0.99	1	-1	0.03	0.04	0.4	0	5	1	173.9	0.00535
50	0.6	0.99	1	-1	0.03	0.04	0.4	0.3	5	1	257.2	0.00176
50	0.4	0.99	1	-1	0.03	0.04	0.4	0	5	1	312.55	0.02772
50	0.7	0.99	1	-1	0.03	0.04	0.4	0.5	5	1	291.07	0.00028
50	0.6	0.99	1	-1	0.03	0.04	0.4	0.2	5	1	302.9	0.00542
50	0.2	0.99	1	-1	0.03	0.04	0.4	0	5	1	228.01	0.01901
50	0.7	0.99	1	-1	0.03	0.04	0.4	0.4	5	1	324.28	0.00123
10	0.99	0.99	1	-1	0.03	0.04	0.4	0.1	5	1	1233.7	0.08251
50	0.5	0.99	1	-1	0.03	0.04	0.4	0.1	5	1	290.65	0.01173
10	0.99	0.99	1	-1	0.03	0.04	0.4	0.2	5	1	1224.8	0.08147
50	0.3	0.99	1	-1	0.03	0.04	0.4	0	5	1	264.35	0.0236
50	0.8	0.99	1	-1	0.03	0.04	0.4	0.9	5	1	375.17	2e-05
50	0.8	0.99	1	-1	0.03	0.04	0.4	0.8	5	1	395.55	8e-05
10	0.99	0.99	1	-1	0.03	0.04	0.4	0.4	5	1	1229.7	0.08304
10	0.99	0.99	1	-1	0.03	0.04	0.4	0.3	5	1	1224.8	0.08113
50	0.8	0.99	1	-1	0.03	0.04	0.4	0.7	5	1	421.15	0.0002
50	0.8	0.99	1	-1	0.03	0.04	0.4	0.6	5	1	452.74	0.00052
50	0.5	0.99	1	-1	0.03	0.04	0.4	0	5	1	375.89	0.03113
50	0.6	0.99	1	-1	0.03	0.04	0.4	0.1	5	1	380.15	0.01589
50	0.7	0.99	1	-1	0.03	0.04	0.4	0.3	5	1	372.27	0.00331
10	0.99	0.99	1	-1	0.03	0.04	0.4	0.6	5	1	1226.7	0.08191
10	0.99	0.99	1	-1	0.03	0.04	0.4	0.7	5	1	1230.4	0.0807
50	0.8	0.99	1	-1	0.03	0.04	0.4	0.5	5	1	491.02	0.00111
50	0.6	0.99	1	-1	0.03	0.04	0.4	0	5	1	468.19	0.03254
50	0.7	0.99	1	-1	0.03	0.04	0.4	0.2	5	1	431.34	0.00826
50	0.8	0.99	1	-1	0.03	0.04	0.4	0.4	5	1	546.14	0.00283
50	0.7	0.99	1	-1	0.03	0.04	0.4	0.1	5	1	528.62	0.01829
50	0.8	0.99	1	-1	0.03	0.04	0.4	0.3	5	1	616.15	0.00561
50	0.8	0.99	1	-1	0.03	0.04	0.4	0.2	5	1	699.31	0.01067
50	0.9	0.99	1	-1	0.03	0.04	0.4	0.9	5	1	941.86	0.00065
50	0.7	0.99	1	-1	0.03	0.04	0.4	0	5	1	623.68	0.0334
50	0.8	0.99	1	-1	0.03	0.04	0.4	0.1	5	1	811.74	0.01997
50	0.9	0.99	1	-1	0.03	0.04	0.4	0.8	5	1	991.47	0.00097
50	0.9	0.99	1	-1	0.03	0.04	0.4	0.7	5	1	1042.5	0.00147
50	0.8	0.99	1	-1	0.03	0.04	0.4	0	5	1	945.64	0.03262
50	0.9	0.99	1	-1	0.03	0.04	0.4	0.6	5	1	1117.6	0.0025
50	0.9	0.99	1	-1	0.03	0.04	0.4	0.5	5	1	1190.5	0.00383
50	0.9	0.99	1	-1	0.03	0.04	0.4	0.4	5	1	1289.5	0.00612
50	0.9	0.99	1	-1	0.03	0.04	0.4	0.3	5	1	1377.8	0.00847
50	0.9	0.99	1	-1	0.03	0.04	0.4	0.2	5	1	1511.9	0.01191
50	0.9	0.99	1	-1	0.03	0.04	0.4	0.1	5	1	1609.8	0.01677
50	0.9	0.99	1	-1	0.03	0.04	0.4	0	5	1	1738.9	0.02202
50	0.99	0.99	1	-1	0.03	0.04	0.4	0.5	5	1	8978.8	0.00638
50	0.99	0.99	1	-1	0.03	0.04	0.4	0.9	5	1	8954.8	0.00615
50	0.99	0.99	1	-1	0.03	0.04	0.4	0.7	5	1	9027	0.00681
50	0.99	0.99	1	-1	0.03	0.04	0.4	0.8	5	1	8954.7	0.00613
50	0.99	0.99	1	-1	0.03	0.04	0.4	0	5	1	9027.4	0.00663
50	0.99	0.99	1	-1	0.03	0.04	0.4	0.4	5	1	9035.7	0.0068
50	0.99	0.99	1	-1	0.03	0.04	0.4	0.6	5	1	8986.9	0.00631
50	0.99	0.99	1	-1	0.03	0.04	0.4	0.3	5	1	9122.5	0.00686
50	0.99	0.99	1	-1	0.03	0.04	0.4	0.1	5	1	9067.3	0.00706
50	0.99	0.99	1	-1	0.03	0.04	0.4	0.2	5	1	9033.5	0.00696
